# Supplementary material for: Ecological comparison of tuberculosis and TB HIV coinfection in postconflict Liberia and Sierra Leone as markers of health security
Source: Research Square preprint supplement (doi:10.21203/rs.3.rs-7510274/v1), 2025-09-22
Supplement: Supplementary file 1 [file 129ac10065b55cd8de6fdcdf.pdf]

## Supplementary Materials

Table S1. Two-way fixed-effects regression of TB incidence (per 100,000), Liberia and Sierra Leone, 2000–2022 (Driscoll-Kraay SEs)

| Predictor                            | B      | SE (DK) | <i>t</i> | <i>p</i> |
|--------------------------------------|--------|---------|----------|----------|
| TB-HIV co-infection (%)              | -1.760 | 0.454   | -3.880   | <0.001   |
| Health expenditure per capita (US\$) | 0.014  | 0.138   | 0.105    | 0.917    |
| GDP per capita (2015 US\$)           | -0.145 | 0.018   | -7.903   | <0.001   |
| Conflict events (count)              | -0.047 | 0.035   | -1.364   | 0.173    |

Note: Models include country and year fixed effects. Standard errors are Driscoll-Kraay (HC1), estimated with a Bartlett kernel and plug-in bandwidth. Sample: Liberia and Sierra Leone, 2000–2022 (N = 46). *p*-values in this table use the asymptotic normal reference; interpretation emphasizes coefficients and Driscoll-Kraay 95% confidence intervals, which can be computed as  $B \pm 1.96 \times SE$  from the reported standard errors.

A two-way fixed-effects model examined associations between the tuberculosis incidence rate, per 100,000 population, and selected covariates for Liberia and Sierra Leone from 2000 to 2022 (N = 46 country-year observations). TB-HIV co-infection (percent) was negatively associated with TB incidence ( $b = -1.760$ ,  $SE = 0.454$ ,  $t = -3.880$ ,  $p < 0.001$ ). Health expenditure per capita (US dollars) was not statistically significant ( $b = 0.014$ ,  $SE = 0.138$ ,  $t = 0.105$ ,  $p = 0.917$ ). GDP per capita (2015 US dollars) showed an inverse association ( $b = -0.145$ ,  $SE = 0.018$ ,  $t = -7.903$ ,  $p < 0.001$ ). Conflict events (count) were not statistically significant ( $b = -0.047$ ,  $SE = 0.035$ ,  $t = -1.364$ ,  $p = 0.173$ ). Models included country and year fixed effects; inference used Driscoll-Kraay (HC1) standard errors with a Bartlett kernel and plug-in bandwidth.

**Table S2.** Two-way fixed-effects regression of TB incidence (per 100,000) in Liberia and Sierra Leone, 2016–2022, including TB-HIV testing coverage; Driscoll-Kraay standard errors

| Predictor                            | B      | SE (DK) | <i>t</i> | <i>p</i> |
|--------------------------------------|--------|---------|----------|----------|
| TB-HIV co-infection (%)              | 0.139  | 0.163   | 0.852    | 0.394    |
| Health expenditure per capita (US\$) | 0.089  | 0.011   | 7.942    | <0.001   |
| GDP per capita (2015 US\$)           | -0.099 | 0.011   | -9.173   | <0.001   |
| Conflict events (count)              | -0.001 | 0.006   | -0.237   | 0.812    |
| TB-HIV testing coverage (%)          | 0.087  | 0.022   | 3.883    | <0.001   |

Note: Models include country and year fixed effects. Standard errors are Driscoll-Kraay (HCl), estimated with a Bartlett kernel and plug-in bandwidth. Sample: Liberia and Sierra Leone, 2016–2022 (N = 14). *p*-values in this table use the asymptotic normal reference; interpretation emphasizes coefficients and Driscoll-Kraay 95% confidence intervals, which can be computed as  $B \pm 1.96 \times SE$  from the reported standard errors.

A two-way fixed-effects model examined associations between the tuberculosis incidence rate, per 100,000 population, and selected covariates for Liberia and Sierra Leone from 2016 to 2022 (N = 14 country-year observations). In this specification, the TB-HIV testing coverage variable is included. TB-HIV co-infection (percent) was not significantly associated with TB incidence ( $b = 0.139$ ,  $SE = 0.163$ ,  $t = 0.852$ ,  $p = 0.394$ ). Health expenditure per capita (US dollars) showed a positive association ( $b = 0.089$ ,  $SE = 0.011$ ,  $t = 7.942$ ,  $p < 0.001$ ). GDP per capita (2015 US dollars) showed an inverse association ( $b = -0.099$ ,  $SE = 0.011$ ,  $t = -9.173$ ,  $p < 0.001$ ). Conflict events (count) were not statistically significant ( $b = -0.001$ ,  $SE = 0.006$ ,  $t = -0.237$ ,  $p = 0.812$ ). TB-HIV testing coverage (percent) was positively associated with TB incidence ( $b = 0.087$ ,  $SE = 0.022$ ,  $t = 3.883$ ,  $p < 0.001$ ). Models included country and year fixed effects; inference used Driscoll-Kraay (HCl) standard errors with a Bartlett kernel and plug-in bandwidth.

**Table S3.** Two-way fixed-effects model (country and year); outcome is TB incidence rate (per 100,000), 2016–2022. Sample excludes TB–HIV testing coverage. Standard errors: Driscoll-Kraay (HCl).

| Variable                             | Estimate | SE (DK) | <i>t</i> | <i>p</i> |
|--------------------------------------|----------|---------|----------|----------|
| TB-HIV co-infection (%)              | -0.377   | 0.335   | -1.124   | 0.261    |
| Health expenditure per capita (US\$) | 0.093    | 0.010   | 8.982    | <0.001   |
| GDP per capita (2015 US\$)           | -0.085   | 0.020   | -4.306   | <0.001   |
| Conflict events (count)              | -0.014   | 0.013   | -1.077   | 0.282    |

Note: Dependent variable is TB incidence rate (per 100,000 population). Models include country and year fixed effects. Standard errors are Driscoll-Kraay (HCl), estimated with a Bartlett kernel and plug-in bandwidth. Sample includes 14 country-year observations for Liberia and Sierra Leone (2016–2022). Covariates: TB–HIV co-infection (%), health expenditure per capita (US\$), GDP per capita (2015 US\$), and conflict events (count). *p*-values in this table use the asymptotic normal reference; interpretation emphasizes coefficients and Driscoll-Kraay 95% confidence intervals, which can be computed as  $B \pm 1.96 \times SE$  from the reported standard errors.

Supplementary Table S3 presents re-estimated results from the primary two-way fixed-effects model using data from 2016 to 2022. In this specification, the TB–HIV testing coverage variable is excluded. The analysis applies Driscoll-Kraay (HCl) standard errors and includes country and year fixed effects. TB–HIV co-infection (percent) was not significantly associated with TB incidence per 100,000 population ( $b = -0.377$ ,  $SE = 0.335$ ,  $t = -1.124$ ,  $p = 0.261$ ). Health expenditure per capita (US dollars) showed a positive association with TB incidence per 100,000 population ( $b = 0.093$ ,  $SE = 0.010$ ,  $t = 8.982$ ,  $p < 0.001$ ). GDP per capita (2015 US dollars) showed an inverse association ( $b = -0.085$ ,  $SE = 0.020$ ,  $t = -4.306$ ,  $p < 0.001$ ). Conflict events (count) were not statistically significant ( $b = -0.014$ ,  $SE = 0.013$ ,  $t = -1.077$ ,  $p = 0.282$ ). Overall, the pattern is broadly consistent with the primary specification.

**Table S4.** Two-way fixed-effects regression of TB mortality among HIV-negative persons (per 100,000), Liberia and Sierra Leone, 2000–2022.

| Variable                             | Estimate | SE (DK) | <i>t</i> | <i>p</i> |
|--------------------------------------|----------|---------|----------|----------|
| TB-HIV co-infection (%)              | -2.138   | 0.377   | -5.665   | <0.001   |
| Health expenditure per capita (US\$) | 0.101    | 0.128   | 0.792    | 0.438    |
| GDP per capita (2015 US\$)           | -0.075   | 0.014   | -5.437   | <0.001   |
| Conflict events (count)              | -0.041   | 0.018   | -2.245   | 0.038    |

Note: Outcome is TB mortality rate (excluding HIV) per 100,000 population. Models include country and year fixed effects. Standard errors are Driscoll-Kraay (HCl) with a Bartlett kernel and plug-in bandwidth. Sample: Liberia and Sierra Leone, 2000–2022 (N = 46 country-year observations). Covariates: TB-HIV co-infection (%), health expenditure per capita (US dollars), GDP per capita (2015 US dollars), and conflict events (count). *p*-values in this table use the asymptotic normal reference; interpretation emphasizes coefficients and Driscoll-Kraay 95% confidence intervals, which can be computed as  $B \pm 1.96 \times SE$  from the reported standard errors. Significance stars are based on the asymptotic normal reference ( $\dagger p < 0.10$ ,  $p < 0.05$ ,  $p < 0.01$ ,  $p < 0.001$ ).

A two-way fixed-effects model examined associations between the tuberculosis mortality rate (excluding HIV), per 100,000 population, and selected covariates for Liberia and Sierra Leone from 2000 to 2022 (N = 46 country-year observations). TB-HIV co-infection (percent) was negatively associated with TB mortality ( $b = -2.138$ ,  $SE = 0.377$ ,  $t = -5.665$ ,  $p < 0.001$ ). Health expenditure per capita (US dollars) was not statistically significant ( $b = 0.101$ ,  $SE = 0.128$ ,  $t = 0.792$ ,  $p = 0.428$ ). GDP per capita (2015 US dollars) showed an inverse association ( $b = -0.075$ ,  $SE = 0.014$ ,  $t = -5.437$ ,  $p < 0.001$ ). Conflict events (count) were negatively associated with TB mortality ( $b = -0.041$ ,  $SE = 0.018$ ,  $t = -2.245$ ,  $p = 0.025$ ). Models included country and year fixed effects; inference used Driscoll-Kraay (HCl) standard errors with a Bartlett kernel and plug-in bandwidth.
