# Supplementary material for: Ecological comparison of tuberculosis and TB HIV coinfection in postconflict Liberia and Sierra Leone as markers of health security
Source: Research Square preprint supplement (doi:10.21203/rs.3.rs-7510274/v1), 2025-09-22
Supplement: Supplementary file 2 [file 3a1af6de63a1a0c792cc8572.docx]

# =====================================================================

# Liberia and Sierra Leone TB Analysis (2000–2022)

# Reproduces Table 2 (descriptives), Tables 3–4, Supplementary S1–S4,

# and §3.4 robustness outputs (LMM and OLS with HC3).

# =====================================================================

## 0) Packages ---------------------------------------------------------

req <- c(

"dplyr","tidyr","readr",

"plm","lmtest","sandwich","clubSandwich",

"lme4","lmerTest",

"flextable","officer"

)

ip <- setdiff(req, rownames(installed.packages()))

if (length(ip)) install.packages(ip)

suppressPackageStartupMessages({

library(dplyr); library(tidyr); library(readr)

library(plm); library(lmtest); library(sandwich); library(clubSandwich)

library(lme4); library(lmerTest)

library(flextable); library(officer)

})

## 1) Input ------------------------------------------------------------

# Analysis-ready panel file (relative path). Replace with your file if needed.

# Must contain: iso3, year, e_inc_100k, e_tbhiv_prct, health_exp_pc, gdp_pc,

# conflict_events, tb_hiv_test_cov (2016–2022), and TB mortality excl. HIV column.

data_file <- "data/tb_panel_LBR_SLE_2000_2022.csv"

if (exists("tb_full")) {

panel <- as.data.frame(tb_full)

} else {

panel <- readr::read_csv(data_file, show_col_types = FALSE) |> as.data.frame()

}

## 2) Harmonize and verify columns ------------------------------------

panel$iso3 <- as.character(panel$iso3)

panel$year <- suppressWarnings(as.integer(panel$year))

# Synonyms resolver for key variables (handles common naming variants)

pick_col <- function(df, patterns, label){

for (pt in patterns) {

hit <- grep(pt, names(df), ignore.case = TRUE, value = TRUE)

if (length(hit)) return(hit[1])

}

stop(sprintf("Required variable missing for: %s (add/rename in panel).", label))

}

var_iso <- pick_col(panel, c("^iso3$","^iso$","iso.*3"), "iso3")

var_year <- pick_col(panel, c("^year$","^yr$"), "year")

var_inc <- pick_col(panel, c("^e_?inc_?100k$","tb.*inciden.*100k","incidence.*100k","tb_?rate$"), "TB incidence")

var_tbhiv <- pick_col(panel, c("^e_?tbhiv_?prct$","tbhiv.*percent","tb.*hiv.*(pct|percent|share)"), "TB–HIV co-infection %")

var_hexp <- pick_col(panel, c("^health_?exp_?pc$","health.*expend.*per.*cap","che.*(pc|usd)"), "Health exp. per capita")

var_gdp <- pick_col(panel, c("^gdp_?pc$","gdp.*per.*cap"), "GDP per capita (2015 US$)")

var_conf <- pick_col(panel, c("^conflict_?events$","acled.*events","events(_count)?","conflict.*count"), "Conflict events")

# HIV testing coverage (2016–2022 only)

var_testcov <- pick_col(panel, c("^tb_?hiv_?test.*cov","tb.*hiv.*test.*cover","share.*tb.*hiv.*tested"), "TB–HIV testing coverage")

# TB mortality excluding HIV (per 100,000)

var_mort_ex <- pick_col(panel, c("mort.*excl.*hiv.*100k","e_?mort_?exc_?tbhiv_?100k","tb.*mortality.*hiv-?neg"), "TB mortality excl. HIV")

# Subset Liberia and Sierra Leone only (if more are present)

panel <- panel |>

filter(.data[[var_iso]] %in% c("LBR","SLE")) |>

mutate(

iso3 = .data[[var_iso]],

year = .data[[var_year]],

e_inc_100k = .data[[var_inc]],

e_tbhiv_prct = .data[[var_tbhiv]],

health_exp_pc = .data[[var_hexp]],

gdp_pc = .data[[var_gdp]],

conflict_events = .data[[var_conf]],

tb_hiv_test_cov = .data[[var_testcov]],

mort_exc_hiv_100k = .data[[var_mort_ex]]

) |>

select(iso3, year, e_inc_100k, e_tbhiv_prct, health_exp_pc, gdp_pc, conflict_events, tb_hiv_test_cov, mort_exc_hiv_100k)

stopifnot(nrow(panel) > 0)

## 3) Helpers ----------------------------------------------------------

fmt3 <- function(x) sprintf("%.3f", x)

fmt_pn <- function(p) ifelse(is.na(p), NA_character_,

ifelse(p < 0.001, "<0.001", sprintf("%.3f", p)))

fmt_ci <- function(est, se) sprintf("[%.3f, %.3f]", est - 1.96*se, est + 1.96*se)

vcov_DK <- function(fit, years_vec){

T_sub <- length(unique(years_vec))

bw <- max(1, floor(4 * (T_sub / 100)^(2/9)))

plm::vcovSCC(fit, type = "HC1", maxlag = bw)

}

mk_twfe <- function(df, outcome, preds, years = c(2000, 2022)) {

d <- df |>

filter(year >= years[1], year <= years[2]) |>

select(iso3, year, all_of(c(outcome, preds))) |>

drop_na()

stopifnot(nrow(d) > 0)

fit <- plm::plm(

reformulate(preds, outcome),

data = d, index = c("iso3","year"),

model = "within", effect = "twoways"

)

V <- vcov_DK(fit, d$year)

ct <- lmtest::coeftest(fit, vcov = V)

list(data = d, fit = fit, V = V, ct = ct)

}

## 4) Table 2: Descriptive statistics ----------------------------------

vars_t2 <- c(

"e_inc_100k" = "TB incidence (per 100,000)",

"mort_exc_hiv_100k" = "TB mortality (excluding HIV), per 100,000",

"e_tbhiv_prct" = "TB–HIV co-infection (percent)"

)

desc_one <- function(x) c(Mean = mean(x, na.rm = TRUE), SD = sd(x, na.rm = TRUE))

T2_LBR <- panel |> filter(iso3 == "LBR") |>

summarise(across(all_of(names(vars_t2)), desc_one)) |>

pivot_longer(everything(),

names_to = "Variable", values_to = "Value") |>

separate(Variable, into = c("Var","Stat"), sep = "_(?=[MS]D$)") |>

mutate(Var = factor(Var, levels = names(vars_t2), labels = unname(vars_t2))) |>

pivot_wider(names_from = Stat, values_from = Value) |>

mutate(Country = "Liberia", .before = 1)

T2_SLE <- panel |> filter(iso3 == "SLE") |>

summarise(across(all_of(names(vars_t2)), desc_one)) |>

pivot_longer(everything(),

names_to = "Variable", values_to = "Value") |>

separate(Variable, into = c("Var","Stat"), sep = "_(?=[MS]D$)") |>

mutate(Var = factor(Var, levels = names(vars_t2), labels = unname(vars_t2))) |>

pivot_wider(names_from = Stat, values_from = Value) |>

mutate(Country = "Sierra Leone", .before = 1)

T2_ALL <- panel |>

summarise(across(all_of(names(vars_t2)), desc_one)) |>

pivot_longer(everything(),

names_to = "Variable", values_to = "Value") |>

separate(Variable, into = c("Var","Stat"), sep = "_(?=[MS]D$)") |>

mutate(Var = factor(Var, levels = names(vars_t2), labels = unname(vars_t2))) |>

pivot_wider(names_from = Stat, values_from = Value) |>

mutate(Country = "All", .before = 1)

Table2 <- bind_rows(T2_LBR, T2_SLE, T2_ALL) |>

rename(`Variable` = Var) |>

mutate(Mean = fmt3(Mean), SD = fmt3(SD))

dir.create("tables", showWarnings = FALSE)

ft2 <- flextable(Table2) |>

fontsize(part = "all", size = 10) |>

align(j = 3:4, align = "right") |>

set_caption("Table 2. Descriptive statistics (means and standard deviations)")

print(read_docx() |> body_add_flextable(ft2), target = "tables/Table2.docx")

## 5) ## ===================== Table 3 — TWFE (2000–2022), DK (HC1); p = t(df = 1) =====================

# Assumes tb_full with: iso3, year, e_inc_100k, e_tbhiv_prct, health_exp_pc, gdp_pc, conflict_events

suppressPackageStartupMessages({ library(dplyr); library(plm); library(lmtest) })

fmt3 <- function(x) sprintf("%.3f", x)

fmtp <- function(p) ifelse(p < 0.001, "<0.001", sprintf("%.3f", p))

tb <- as.data.frame(tb_full)

tb$year <- suppressWarnings(as.integer(tb$year))

need <- c("iso3","year","e_inc_100k","e_tbhiv_prct","health_exp_pc","gdp_pc","conflict_events")

stopifnot(all(need %in% names(tb)))

dat_t3 <- tb |>

dplyr::filter(year >= 2000, year <= 2022) |>

dplyr::select(dplyr::all_of(need)) |>

tidyr::drop_na()

mod_t3 <- plm::plm(

e_inc_100k ~ e_tbhiv_prct + health_exp_pc + gdp_pc + conflict_events,

data = dat_t3, index = c("iso3","year"), model = "within", effect = "twoways"

)

# Driscoll-Kraay (HC1) with Bartlett kernel (plug-in bandwidth)

T_sub <- length(unique(dat_t3$year))

bw <- max(1, floor(4 * (T_sub / 100)^(2/9)))

V_DK <- plm::vcovSCC(mod_t3, type = "HC1", maxlag = bw)

ct3 <- lmtest::coeftest(mod_t3, vcov. = V_DK)

labs <- c(

e_tbhiv_prct = "TB-HIV co-infection (%)",

health_exp_pc = "Health expenditure per capita (US$)",

gdp_pc = "GDP per capita (2015 US$)",

conflict_events = "Conflict events (count)"

)

keep <- rownames(ct3) %in% names(labs)

est <- unname(ct3[keep, "Estimate"])

se <- unname(ct3[keep, "Std. Error"])

tval <- unname(ct3[keep, "t value"])

# p-values from conservative t reference with df = G - 1 = 1

p_df1 <- 2 * stats::pt(-abs(tval), df = 1)

Table3 <- data.frame(

Predictor = labs[rownames(ct3)[keep]],

B = fmt3(est),

`SE (DK)` = fmt3(se),

t = fmt3(tval),

p = fmtp(p_df1),

check.names = FALSE

)

# Sanity: t ≈ B / SE on unrounded values

stopifnot(all.equal(tval, est / se, tolerance = 1e-10) == TRUE)

cat("\nTable 3 — Two-way fixed effects (country and year), 2000–2022; SEs: Driscoll-Kraay (HC1); p = t(df = 1)\n")

print(Table3, row.names = FALSE)

# Optional Word export (kept simple; remove if you don’t use it):

# suppressPackageStartupMessages({ library(flextable); library(officer) })

# ft3 <- flextable::flextable(Table3) |>

# flextable::autofit() |>

# flextable::align(j = 2:5, align = "right") |>

# flextable::fontsize(size = 10, part = "all") |>

# flextable::set_caption("Table 3. Two-way fixed-effects regression of TB incidence (per 100,000), 2000–2022 (Driscoll-Kraay SEs; p from t with df = 1)")

# officer::read_docx() |>

# flextable::body_add_flextable(ft3) |>

# print(target = "tables/Table3.docx")

## 6) Table 4: TWFE, 2016–2022 with testing coverage, DK (HC1) -----------------

preds_t4 <- c("e_tbhiv_prct","health_exp_pc","gdp_pc","conflict_events","tb_hiv_test_cov")

res_t4 <- mk_twfe(panel, outcome = "e_inc_100k", preds = preds_t4, years = c(2016, 2022))

ct4 <- res_t4$ct

labs_t4 <- c(

e_tbhiv_prct = "TB–HIV co-infection (percent)",

health_exp_pc = "Health expenditure per capita (US dollars)",

gdp_pc = "GDP per capita (2015 US dollars)",

conflict_events = "Conflict events (count)",

tb_hiv_test_cov = "TB–HIV testing coverage (percent)"

)

keep4 <- rownames(ct4) %in% names(labs_t4)

Table4 <- data.frame(

Predictor = labs_t4[rownames(ct4)[keep4]],

B = fmt3(unname(ct4[keep4, "Estimate"])),

`SE (DK)` = fmt3(unname(ct4[keep4, "Std. Error"])),

t = fmt3(unname(ct4[keep4, "t value"])),

p = fmt_pn(unname(ct4[keep4, "Pr(>|t|)"])), # asymptotic normal reference

check.names = FALSE

)

# APA-scaled version (per 10 pp; per $100; per 100 events)

scale <- c(e_tbhiv_prct = 10, health_exp_pc = 100, gdp_pc = 100, conflict_events = 100, tb_hiv_test_cov = 10)

vars4 <- names(labs_t4)

est4s <- unname(ct4[vars4, "Estimate"]) * scale[vars4]

se4s <- unname(ct4[vars4, "Std. Error"]) * scale[vars4]

t4s <- unname(ct4[vars4, "t value"])

p4s <- unname(ct4[vars4, "Pr(>|t|)"])

labs4s <- c(

"e_tbhiv_prct" = "TB–HIV co-infection (per 10 percentage points)",

"health_exp_pc" = "Health expenditure per capita (per 100 US dollars)",

"gdp_pc" = "GDP per capita, 2015 US dollars (per 100 US dollars)",

"conflict_events" = "Conflict events (per 100 events)",

"tb_hiv_test_cov" = "TB–HIV testing coverage (per 10 percentage points)"

)

Table4_APA <- data.frame(

Predictor = labs4s[vars4],

B = fmt3(est4s),

`SE (DK)` = fmt3(se4s),

t = fmt3(t4s),

`p (normal)` = fmt_pn(p4s),

`95% CI (DK)`= fmt_ci(est4s, se4s),

check.names = FALSE

)

ft4 <- flextable(Table4) |>

fontsize(part = "all", size = 10) |>

align(j = 2:5, align = "right") |>

set_caption("Table 4. TWFE for TB incidence (per 100,000), 2016–2022 with TB–HIV testing coverage (Driscoll-Kraay SEs; p uses normal reference)")

ft4s <- flextable(Table4_APA) |>

fontsize(part = "all", size = 10) |>

align(j = 2:6, align = "right") |>

set_caption("Table 4 (APA-scaled units). Same model; scaled per 10 percentage points and per 100 units")

doc4 <- read_docx() |> body_add_flextable(ft4) |> body_add_par("") |> body_add_flextable(ft4s)

print(doc4, target = "tables/Table4.docx")

## 7) Supplementary Tables S1–S4 ---------------------------------------

# S1: 2000–2022 incidence, no testing; DK (HC1), p normal

res_s1 <- mk_twfe(panel, outcome = "e_inc_100k", preds = preds_core, years = c(2000, 2022))

ct_s1 <- res_s1$ct

keep_s1 <- rownames(ct_s1) %in% names(labs_t3)

S1 <- data.frame(

Variable = labs_t3[rownames(ct_s1)[keep_s1]],

Estimate = fmt3(unname(ct_s1[keep_s1, "Estimate"])),

`SE (DK)`= fmt3(unname(ct_s1[keep_s1, "Std. Error"])),

t = fmt3(unname(ct_s1[keep_s1, "t value"])),

p = fmt_pn(unname(ct_s1[keep_s1, "Pr(>|t|)"])),

check.names = FALSE

)

# S2: 2016–2022 incidence with testing; DK (HC1), p normal

res_s2 <- mk_twfe(panel, outcome = "e_inc_100k", preds = preds_t4, years = c(2016, 2022))

ct_s2 <- res_s2$ct

keep_s2 <- rownames(ct_s2) %in% names(labs_t4)

S2 <- data.frame(

Variable = labs_t4[rownames(ct_s2)[keep_s2]],

Estimate = fmt3(unname(ct_s2[keep_s2, "Estimate"])),

`SE (DK)`= fmt3(unname(ct_s2[keep_s2, "Std. Error"])),

t = fmt3(unname(ct_s2[keep_s2, "t value"])),

p = fmt_pn(unname(ct_s2[keep_s2, "Pr(>|t|)"])),

check.names = FALSE

)

# S3: 2016–2022 incidence without testing; DK (HC1), p normal

res_s3 <- mk_twfe(panel, outcome = "e_inc_100k", preds = preds_core, years = c(2016, 2022))

ct_s3 <- res_s3$ct

keep_s3 <- rownames(ct_s3) %in% names(labs_t3)

S3 <- data.frame(

Variable = labs_t3[rownames(ct_s3)[keep_s3]],

Estimate = fmt3(unname(ct_s3[keep_s3, "Estimate"])),

`SE (DK)`= fmt3(unname(ct_s3[keep_s3, "Std. Error"])),

t = fmt3(unname(ct_s3[keep_s3, "t value"])),

p = fmt_pn(unname(ct_s3[keep_s3, "Pr(>|t|)"])),

check.names = FALSE

)

# S4: 2000–2022 TB mortality (excluding HIV); DK (HC1), p normal

res_s4 <- mk_twfe(panel, outcome = "mort_exc_hiv_100k", preds = preds_core, years = c(2000, 2022))

ct_s4 <- res_s4$ct

keep_s4 <- rownames(ct_s4) %in% names(labs_t3)

S4 <- data.frame(

Variable = labs_t3[rownames(ct_s4)[keep_s4]],

Estimate = fmt3(unname(ct_s4[keep_s4, "Estimate"])),

`SE (DK)`= fmt3(unname(ct_s4[keep_s4, "Std. Error"])),

t = fmt3(unname(ct_s4[keep_s4, "t value"])),

p = fmt_pn(unname(ct_s4[keep_s4, "Pr(>|t|)"])),

check.names = FALSE

)

ftS1 <- flextable(S1) |> fontsize(part = "all", size = 10) |> align(j = 2:5, align = "right") |>

set_caption("Table S1. TWFE for TB incidence (per 100,000), 2000–2022 (no testing; Driscoll-Kraay SEs; p uses normal reference)")

ftS2 <- flextable(S2) |> fontsize(part = "all", size = 10) |> align(j = 2:5, align = "right") |>

set_caption("Table S2. TWFE for TB incidence (per 100,000), 2016–2022 with testing (Driscoll-Kraay SEs; p uses normal reference)")

ftS3 <- flextable(S3) |> fontsize(part = "all", size = 10) |> align(j = 2:5, align = "right") |>

set_caption("Table S3. TWFE for TB incidence (per 100,000), 2016–2022 without testing (Driscoll-Kraay SEs; p uses normal reference)")

ftS4 <- flextable(S4) |> fontsize(part = "all", size = 10) |> align(j = 2:5, align = "right") |>

set_caption("Table S4. TWFE for TB mortality (excluding HIV), 2000–2022 (Driscoll-Kraay SEs; p uses normal reference)")

docS <- read_docx() |>

body_add_flextable(ftS1) |> body_add_par("") |>

body_add_flextable(ftS2) |> body_add_par("") |>

body_add_flextable(ftS3) |> body_add_par("") |>

body_add_flextable(ftS4)

print(docS, target = "tables/Supplementary_S1_S4.docx")

## 8) §3.4 Robustness outputs (console) --------------------------------

# LMM: country random intercept and year fixed effects

lmm_fit <- lmer(

e_inc_100k ~ e_tbhiv_prct + health_exp_pc + gdp_pc + conflict_events + factor(year) +

(1 | iso3),

data = panel |> filter(year >= 2000, year <= 2022),

REML = TRUE

)

lmm_sum <- summary(lmm_fit)$coef[c("e_tbhiv_prct","health_exp_pc","gdp_pc","conflict_events"), , drop = FALSE]

cat("\n=== Robustness (LMM: country random intercept and year fixed effects) ===\n")

print(round(lmm_sum, 3))

# OLS with country and year fixed effects; HC3 inference

ols_fe <- lm(

e_inc_100k ~ e_tbhiv_prct + health_exp_pc + gdp_pc + conflict_events +

factor(iso3) + factor(year),

data = panel |> filter(year >= 2000, year <= 2022)

)

V_HC3 <- sandwich::vcovHC(ols_fe, type = "HC3")

ct_HC3 <- lmtest::coeftest(ols_fe, vcov. = V_HC3)

keep_rb <- c("e_tbhiv_prct","health_exp_pc","gdp_pc","conflict_events")

cat("\n=== Robustness (OLS with country and year fixed effects; HC3) ===\n")

print(round(ct_HC3[keep_rb, c("Estimate","Std. Error","t value","Pr(>|t|)")], 3))

# End of script
