# Supplementary material for: Ecological comparison of tuberculosis and TB HIV coinfection in postconflict Liberia and Sierra Leone as markers of health security
Source: Research Square preprint supplement (doi:10.21203/rs.3.rs-7510274/v1), 2025-09-22
Supplement: Supplementary file 3 [file d8841500b71e610a973834c0.docx]

**Supplementary Materials**

**Table S1.** Two-way fixed-effects regression of TB incidence (per 100,000), Liberia and Sierra Leone, 2000–2022 (Driscoll-Kraay SEs)

| **Predictor** | **B** | **SE (DK)** | ***t*** | ***p*** |
| --- | --- | --- | --- | --- |
| TB–HIV co-infection (%) | -1.760 | 0.454 | -3.880 | <0.001 |
| Health expenditure per capita (US$) | 0.014 | 0.138 | 0.105 | 0.917 |
| GDP per capita (2015 US$) | -0.145 | 0.018 | -7.903 | <0.001 |
| Conflict events (count) | -0.047 | 0.035 | -1.364 | 0.173 |

Note: Models include country and year fixed effects. Standard errors are Driscoll-Kraay (HC1), estimated with a Bartlett kernel and plug-in bandwidth. Sample: Liberia and Sierra Leone, 2000–2022 (N = 46). *p*-values in this table use the asymptotic normal reference; interpretation emphasizes coefficients and Driscoll-Kraay 95% confidence intervals, which can be computed as B ± 1.96 × SE from the reported standard errors.

A two-way fixed-effects model examined associations between the tuberculosis incidence rate, per 100,000 population, and selected covariates for Liberia and Sierra Leone from 2000 to 2022 (N = 46 country-year observations). TB-HIV co-infection (percent) was negatively associated with TB incidence (*b* = −1.760, *SE* = 0.454, *t* = −3.880, *p* < 0.001). Health expenditure per capita (US dollars) was not statistically significant (*b* = 0.014, *SE* = 0.138, *t* = 0.105, *p* = 0.917). GDP per capita (2015 US dollars) showed an inverse association (*b* = −0.145, *SE* = 0.018, *t* = −7.903, *p* < 0.001). Conflict events (count) were not statistically significant (*b* = −0.047, *SE* = 0.035, *t* = −1.364, *p* = 0.173). Models included country and year fixed effects; inference used Driscoll-Kraay (HC1) standard errors with a Bartlett kernel and plug-in bandwidth.

**Table S2**. Two-way fixed-effects regression of TB incidence (per 100,000) in Liberia and Sierra Leone, 2016–2022, including TB-HIV testing coverage; Driscoll-Kraay standard errors

| **Predictor** | **B** | **SE (DK)** | ***t*** | ***p*** |
| --- | --- | --- | --- | --- |
| TB-HIV co-infection (%) | 0.139 | 0.163 | 0.852 | 0.394 |
| Health expenditure per capita (US$) | 0.089 | 0.011 | 7.942 | <0.001 |
| GDP per capita (2015 US$) | -0.099 | 0.011 | -9.173 | <0.001 |
| Conflict events (count) | -0.001 | 0.006 | -0.237 | 0.812 |
| TB-HIV testing coverage (%) | 0.087 | 0.022 | 3.883 | <0.001 |

Note: Models include country and year fixed effects. Standard errors are Driscoll-Kraay (HC1), estimated with a Bartlett kernel and plug-in bandwidth. Sample: Liberia and Sierra Leone, 2016–2022 (N = 14). *p*-values in this table use the asymptotic normal reference; interpretation emphasizes coefficients and Driscoll-Kraay 95% confidence intervals, which can be computed as B ± 1.96 × SE from the reported standard errors.

A two-way fixed-effects model examined associations between the tuberculosis incidence rate, per 100,000 population, and selected covariates for Liberia and Sierra Leone from 2016 to 2022 (N = 14 country-year observations). In this specification, the TB-HIV testing coverage variable is included. TB-HIV co-infection (percent) was not significantly associated with TB incidence (*b* = 0.139, *SE* = 0.163, *t* = 0.852, *p* = 0.394). Health expenditure per capita (US dollars) showed a positive association (*b* = 0.089, *SE* = 0.011, *t* = 7.942, *p* < 0.001). GDP per capita (2015 US dollars) showed an inverse association (*b* = −0.099, *SE* = 0.011, *t* = −9.173, *p* < 0.001). Conflict events (count) were not statistically significant (*b* = −0.001, *SE* = 0.006, *t* = −0.237, *p* = 0.812). TB-HIV testing coverage (percent) was positively associated with TB incidence (*b* = 0.087, *SE* = 0.022, *t* = 3.883, *p* < 0.001). Models included country and year fixed effects; inference used Driscoll-Kraay (HC1) standard errors with a Bartlett kernel and plug-in bandwidth.

**Table S3**. Two-way fixed-effects model (country and year); outcome is TB incidence rate (per 100,000), 2016–2022. Sample excludes TB–HIV testing coverage. Standard errors: Driscoll-Kraay (HC1).

| **Variable** | **Estimate** | **SE (DK)** | ***t*** | ***p*** |
| --- | --- | --- | --- | --- |
| TB-HIV co-infection (%) | -0.377 | 0.335 | -1.124 | 0.261 |
| Health expenditure per capita (US$) | 0.093 | 0.010 | 8.982 | <0.001 |
| GDP per capita (2015 US$) | -0.085 | 0.020 | -4.306 | <0.001 |
| Conflict events (count) | -0.014 | 0.013 | -1.077 | 0.282 |

Note: Dependent variable is TB incidence rate (per 100,000 population). Models include country and year fixed effects. Standard errors are Driscoll-Kraay (HC1), estimated with a Bartlett kernel and plug-in bandwidth. Sample includes 14 country-year observations for Liberia and Sierra Leone (2016–2022). Covariates: TB–HIV co-infection (%), health expenditure per capita (US$), GDP per capita (2015 US$), and conflict events (count). p-values in this table use the asymptotic normal reference; interpretation emphasizes coefficients and Driscoll-Kraay 95% confidence intervals, which can be computed as B ± 1.96 × SE from the reported standard errors**.**

Supplementary Table S3 presents re-estimated results from the primary two-way fixed-effects model using data from 2016 to 2022. In this specification, the TB-HIV testing coverage variable is excluded. The analysis applies Driscoll-Kraay (HC1) standard errors and includes country and year fixed effects. TB-HIV co-infection (percent) was not significantly associated with TB incidence per 100,000 population (*b* = −0.377, *SE* = 0.335, *t* = −1.124, *p* = 0.261). Health expenditure per capita (US dollars) showed a positive association with TB incidence per 100,000 population (*b* = 0.093, *SE* = 0.010, *t* = 8.982, *p* < 0.001). GDP per capita (2015 US dollars) showed an inverse association (*b* = −0.085, *SE* = 0.020, *t* = −4.306, *p* < 0.001). Conflict events (count) were not statistically significant (*b* = −0.014, *SE* = 0.013, *t* = −1.077, *p* = 0.282). Overall, the pattern is broadly consistent with the primary specification.

**Table S4.** Two-way fixed-effects regression of TB mortality among HIV-negative persons (per 100,000), Liberia and Sierra Leone, 2000–2022.

| **Variable** | **Estimate** | **SE (DK)** | ***t*** | ***p*** |
| --- | --- | --- | --- | --- |
| TB–HIV co-infection (%) | -2.138 | 0.377 | -5.665 | <0.001 |
| Health expenditure per capita (US$) | 0.101 | 0.128 | 0.792 | 0.438 |
| GDP per capita (2015 US$) | -0.075 | 0.014 | -5.437 | <0.001 |
| Conflict events (count) | -0.041 | 0.018 | -2.245 | 0.038 |

Note: Outcome is TB mortality rate (excluding HIV) per 100,000 population. Models include country and year fixed effects. Standard errors are Driscoll-Kraay (HC1) with a Bartlett kernel and plug-in bandwidth. Sample: Liberia and Sierra Leone, 2000–2022 (N = 46 country-year observations). Covariates: TB-HIV co-infection (%), health expenditure per capita (US dollars), GDP per capita (2015 US dollars), and conflict events (count). p-values in this table use the asymptotic normal reference; interpretation emphasizes coefficients and Driscoll-Kraay 95% confidence intervals, which can be computed as B ± 1.96 × SE from the reported standard errors. Significance stars are based on the asymptotic normal reference († *p* < 0.10, *p* < 0.05, p < 0.01, *p* < 0.001).

A two-way fixed-effects model examined associations between the tuberculosis mortality rate (excluding HIV), per 100,000 population, and selected covariates for Liberia and Sierra Leone from 2000 to 2022 (N = 46 country-year observations). TB-HIV co-infection (percent) was negatively associated with TB mortality (*b* = −2.138, *SE* = 0.377, *t* = −5.665, *p* < 0.001). Health expenditure per capita (US dollars) was not statistically significant (*b* = 0.101, *SE* = 0.128, *t* = 0.792, *p* = 0.428). GDP per capita (2015 US dollars) showed an inverse association (*b* = −0.075, *SE* = 0.014, *t* = −5.437, *p* < 0.001). Conflict events (count) were negatively associated with TB mortality (*b* = −0.041, *SE* = 0.018, *t* = −2.245, *p* = 0.025). Models included country and year fixed effects; inference used Driscoll-Kraay (HC1) standard errors with a Bartlett kernel and plug-in bandwidth.
